# Supplementary material
Source: PubMed Central journal article supplement (PMC5381395)
Supplement: jgv-97-767-s001.pdf [file jgv-97-767-s001.pdf]

Supplementary Fig.1: 3D projection displaying the spatial organisation of marked neurons within a latently infected DRG.

Supplementary Fig.2: 3D projection displaying the spatial organisation of marked neurons within a latently infected TG.

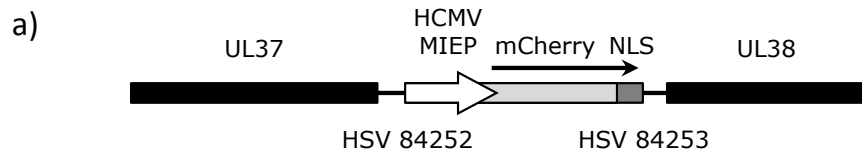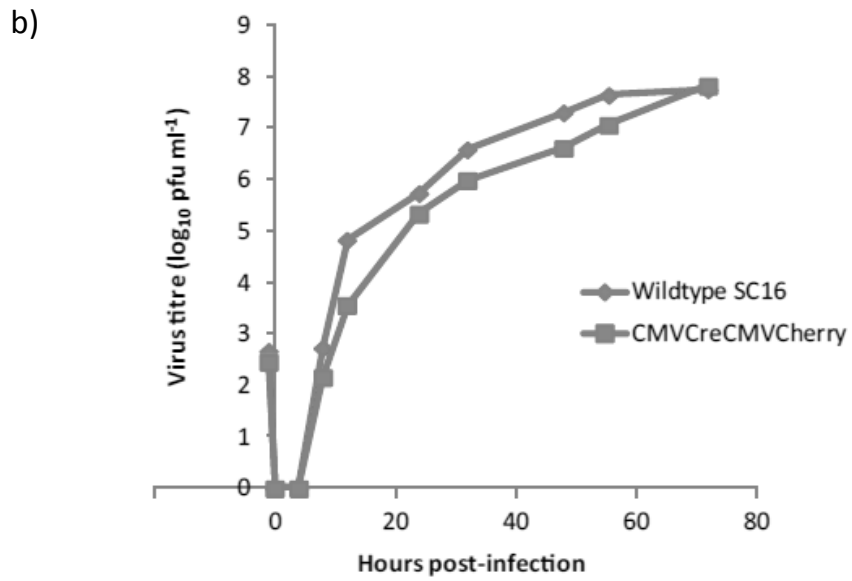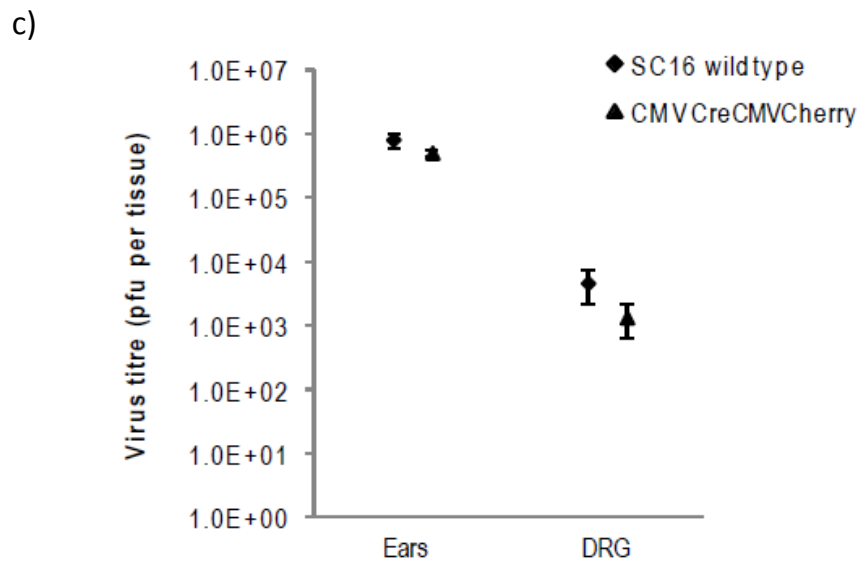

Supplementary Figure 3

Supplementary Fig.3: Characterisation of recombinant HSV CMVCreCMVCherry. a) An mCherry expression cassette was inserted into the UL37/38 intergenic region of HSV CMVCre. b) Low m.o.i. (0.01 pfu cell<sup>-1</sup>) *in vitro* growth curve comparing HSV CMVCreCMVCherry and wildtype strain SC16 replication kinetics. c) Comparison of HSV CMVCreCMVCherry and wildtype titres in skin and ganglion tissues 5 days pi (N = 4 C57BL/6 mice per virus).

|                 | <b>Total # cells</b> | <b>Total # cells reactivated</b> | <b>% reactivation</b> |
|-----------------|----------------------|----------------------------------|-----------------------|
| 37°C Control    | 30                   | 2                                | 6.7                   |
| 43°C Heat-shock | 61                   | 8                                | 13.1                  |

|                 | <b>Total # cells</b> | <b>Total # cells reactivated</b> | <b>% reactivation</b> |
|-----------------|----------------------|----------------------------------|-----------------------|
| 37°C Control    | 35                   | 2                                | 5.7                   |
| 43°C Heat-shock | 31                   | 9                                | 29.0                  |

Supplementary Table.1: Analysis of ZsGreen-positive cell reactivation frequency following incubation at 43°C for 2 hours. Marked neurons were plated at an average density of <1 cell and heat-shock was performed one day post-plating. Reactivation was scored following the development of CPE within a well.
